# Supplementary material
Source: PubMed Central journal article supplement (PMC7953459)
Supplement: NEJMoa2028700_data-sharing.pdf [file NEJMoa2028700_data-sharing.pdf]

## Data Sharing Statement

Rosas IO, Bräu N, Waters M, et al. Tocilizumab in Hospitalized Patients with Severe Covid-19 Pneumonia. N Engl J Med. DOI: 10.1056/NEJMoa2028700.

| Question                                                            | Authors' Response                                 |
|---------------------------------------------------------------------|---------------------------------------------------|
| Will the data collected for your study be made available to others? | Yes                                               |
| Would you like to offer context for your decision?                  | —                                                 |
| Which data?                                                         | Complete de-identified patient data set           |
| Additional information about data                                   | —                                                 |
| How or where can the data be obtained?                              | <a href="https://vivli.org">https://vivli.org</a> |
| When will data availability begin?                                  | After publication                                 |
| When will data availability end?                                    | —                                                 |
| Will any supporting documents be available?                         | —                                                 |

|                                                    |                                                                                                                                                                                                                                                                                                                                                                                                                          |
|----------------------------------------------------|--------------------------------------------------------------------------------------------------------------------------------------------------------------------------------------------------------------------------------------------------------------------------------------------------------------------------------------------------------------------------------------------------------------------------|
| Which supporting documents?                        | —                                                                                                                                                                                                                                                                                                                                                                                                                        |
| Additional information about supporting documents  | —                                                                                                                                                                                                                                                                                                                                                                                                                        |
| How or where can supporting documents be obtained? | —                                                                                                                                                                                                                                                                                                                                                                                                                        |
| When will supporting documents availability begin? | —                                                                                                                                                                                                                                                                                                                                                                                                                        |
| When will supporting documents availability end?   | —                                                                                                                                                                                                                                                                                                                                                                                                                        |
| To whom will data be available?                    | —                                                                                                                                                                                                                                                                                                                                                                                                                        |
| For what type of analysis or purpose?              | —                                                                                                                                                                                                                                                                                                                                                                                                                        |
| By what mechanism?                                 | —                                                                                                                                                                                                                                                                                                                                                                                                                        |
| Any other restrictions?                            | —                                                                                                                                                                                                                                                                                                                                                                                                                        |
| Additional information                             | For further details on Roche’s Global Policy on the Sharing of Clinical Information and how to request access to related clinical study documents, go to <a href="https://www.roche.com/research_and_development/who_we_are_how_we_work/clinical_trials/our_commitment_to_data_sharing.htm">https://www.roche.com/research_and_development/who_we_are_how_we_work/clinical_trials/our_commitment_to_data_sharing.htm</a> |

This statement was posted on February 25, 2021, at NEJM.org.
